# Supplementary material for: Lactobacillus crispatus-derived exopolysaccharides with antibacterial activity limit Salmonella typhimurium invasion by inhibiting inflammasome-mediated pyroptosis
Source: Royal Society of Chemistry journal article supplement (doi:10.1039/d2fo02125k), 2022-01-01
Supplement: d2fo02125k1.pdf [file d2fo02125k1.pdf]

## Supporting Information

### ***Lactobacillus crispatus*-derived Exopolysaccharides with Antibacterial Activity Limit *Salmonella Typhimurium* Invasion by Inhibiting Inflammasome-mediated Pyroptosis**

Chenchen Ding <sup>a</sup>, Huixian Wu <sup>a,b</sup>, Xiuyun Cao <sup>a</sup>, Zhangshan Gao <sup>a</sup>, Zhihui Tang <sup>a</sup>, Wentao Fan <sup>a</sup>, Liping Yan <sup>a</sup>, Bin Liu <sup>b</sup>, Hong Lin <sup>c</sup>, Suquan Song <sup>a\*</sup>

<sup>a</sup> MOE Joint International Research Laboratory of Animal Health and Food Safety, College of Veterinary Medicine, Nanjing Agricultural University, Nanjing, 210095, China

<sup>b</sup> Management office of Dafeng Milu National Nature Reserve, Yancheng, 224136, China

<sup>c</sup> Animal, Plant and Food Inspection Center, Nanjing Customs, Nanjing, 210019, China

#### **\*Corresponding Author:**

Prof. Suquan Song

Email: [suquan.song@njau.edu.cn](mailto:suquan.song@njau.edu.cn)

Phone: +86-25-84395789

Fax: +86-25-84395166

**Supplementary Table 1. Primer sequences.**

| Primer                      | Forward sequence       | Reverse sequence        |
|-----------------------------|------------------------|-------------------------|
| <i>16SrRNA</i>              | CGATGTCTACTTGGAGGTTGTG | CTCTGGAAAGTTCTGTGGATGTC |
| <i>sipA</i>                 | CGCTGTCAGGGGAAATTA     | ATTATCGCTTTCTTACCGGC    |
| <i>sipB</i>                 | GTATGGCAGGCGATGATTGA   | ATAAACACTCTTGGCGGTATCC  |
| <i>sipC</i>                 | GAATAAATCCC GCCGCTTAT  | GGTCACTGACTTTACTGCTG    |
| <i>hilA</i>                 | TATCTCCGGGCAGATGATAC   | TCTGAGCAAAAAGATTTCGCAA  |
| <i>invF</i>                 | ATGAGAATGCTGGGAGAAGA   | AATTGGGTGATGTTCTCGTG    |
| <i>Lactobacillus spp.</i>   | AGCAGTAGGGAATCTTCCA    | CACCGCTACACATGGAG       |
| <i>Bifidobacterium spp.</i> | GCGTGCTTAACACATGCAAGTC | CACCCGTTTCCAGGAGCTATT   |
| <i>Akkermansia</i>          | CAGCACGTGAAGGTGGGGAC   | CCTTGCGGTTGGCTTCAGAT    |
| <i>Enterobacteriaceae</i>   | ATGTTACAACCAAAGCGTACA  | TTACCYTGACGCTTAACTGC    |
| <i>Bax</i>                  | ACCAGCTCTGAACAGATCAT   | AGATGGTCACTGTCTGCCAT    |
| <i>Bcl-2</i>                | GAGATCGTGATGAAGTACAT   | TCAGGTACTCAGTCATCCAC    |
| <i>caspase-3</i>            | TGGGACTGATGAGGAGA      | ACTGGATGAACCACGAC       |

**Supplementary Table 2. The Mw, Mn, peak area percentages and PD of EPS 7-4.**

| Peak | Mw (Da) | Mn     | Peak area (%) | PD index |
|------|---------|--------|---------------|----------|
| P1   | 53,387  | 35,681 | 94.39         | 1.50     |
| P2   | 4,644   | 3,687  | 5.61          | 1.25     |

Mw, Molecular weights; Mn, Number-average molecular weight, PD, Polydispersity.

**Supplementary Table 3. Glycosyl composition analysis results of EPS 7-4.**

| Name            | GalN  | Ara   | GlcN | Gal   | Glc   | Man   | GlcA  |
|-----------------|-------|-------|------|-------|-------|-------|-------|
| Molar Ratio (%) | 4.0   | 16.0  | 12.0 | 7.0   | 30.8  | 36.9  | 7.7   |
| Peak Area       | 0.666 | 0.133 | 1.97 | 0.522 | 2.648 | 1.765 | 0.662 |

GalN, Galactosamine hydrochloride; Ara, Arabinose; GlcN, Glucosamine hydrochloride, Gal, Galactose; Glc,

Glucose; Man, Mannose; GlcA, Glucuronic acid.

Supplementary Table 4. The MIC of EPS 7-4 by Broth microanalysis.

| Pathogens                                | Antimicrobial agent |          |           |           |           |           |           |
|------------------------------------------|---------------------|----------|-----------|-----------|-----------|-----------|-----------|
|                                          | EPS 7-4             | EPS 7-4  | EPS 7-4   | EPS 7-4   | EPS 7-4   | EPS 7-4   | EPS 7-4   |
|                                          | (2mg/mL)            | (5mg/mL) | (10mg/mL) | (20mg/mL) | (30mg/mL) | (40mg/mL) | (50mg/mL) |
| <i>E.coli</i> ATCC25922                  | +                   | +        | +         | +         | +         | +         | -         |
| <i>Salmonella typhimurium</i><br>CVCC542 | +                   | +        | -         | -         | -         | -         | -         |
| <i>Salmonella enterica</i><br>ATCC19585  | +                   | +        | +         | -         | -         | -         | -         |

+, broth cloudy; -, broth clarify

Supplementary Figure 1

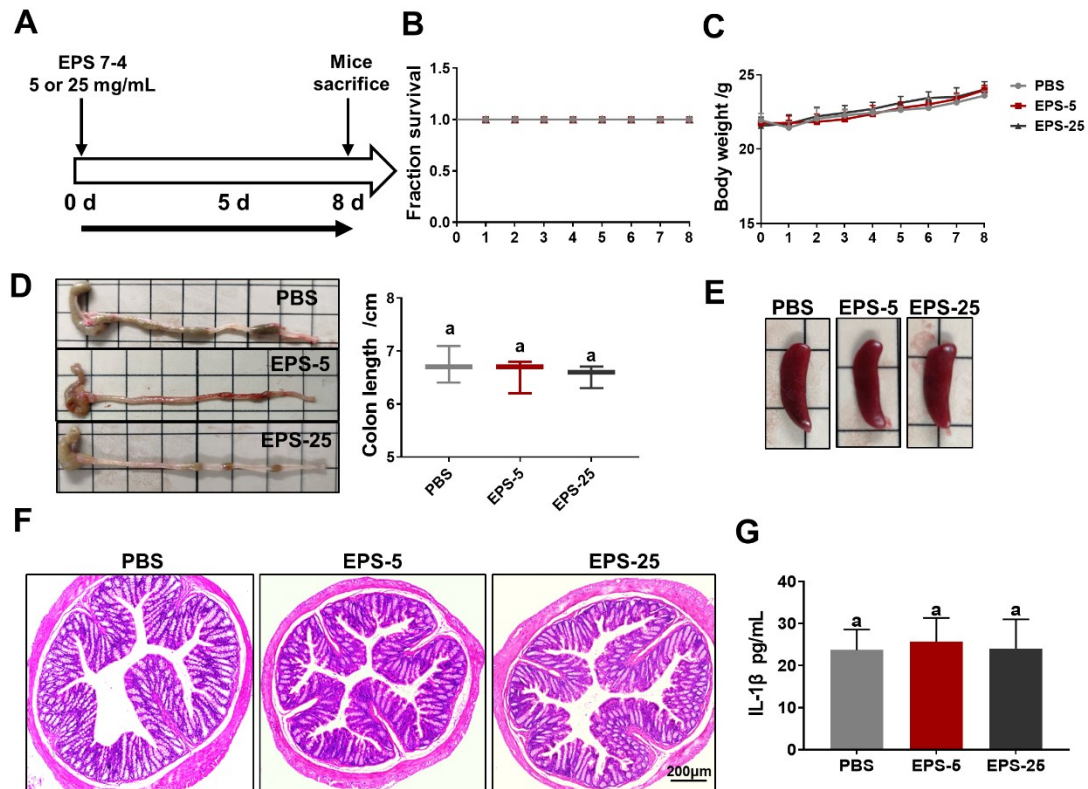

**Fig. S1 The effect of EPS 7-4 on mice.**

(A) Animal experiment process. (B) Survival rate. (C) Body weight change. (D) Colon image acquisition and length measurement. (E) Spleen image acquisition. (F) Colon histological observation and blindly scored (0 = none, 1 = very mild, 2 = mild, 3 = moderate, 4 = severe) for epithelial damage and submucosal edema (Scale bar: 200  $\mu\text{m}$ ). (G) IL-1 $\beta$  level in serum. n = 3.

**Supplementary Figure 2**

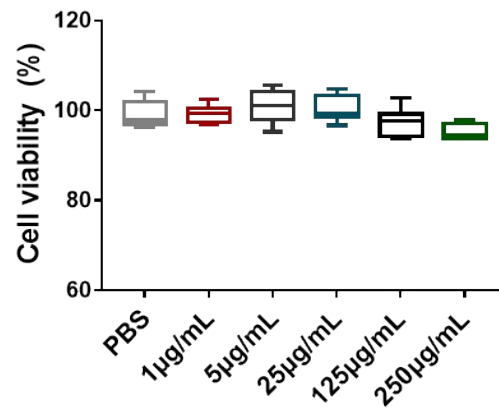

**Figure S2. The cytotoxicity of EPS 7-4 on NCM460 cells.**

### Supplementary Figure 3

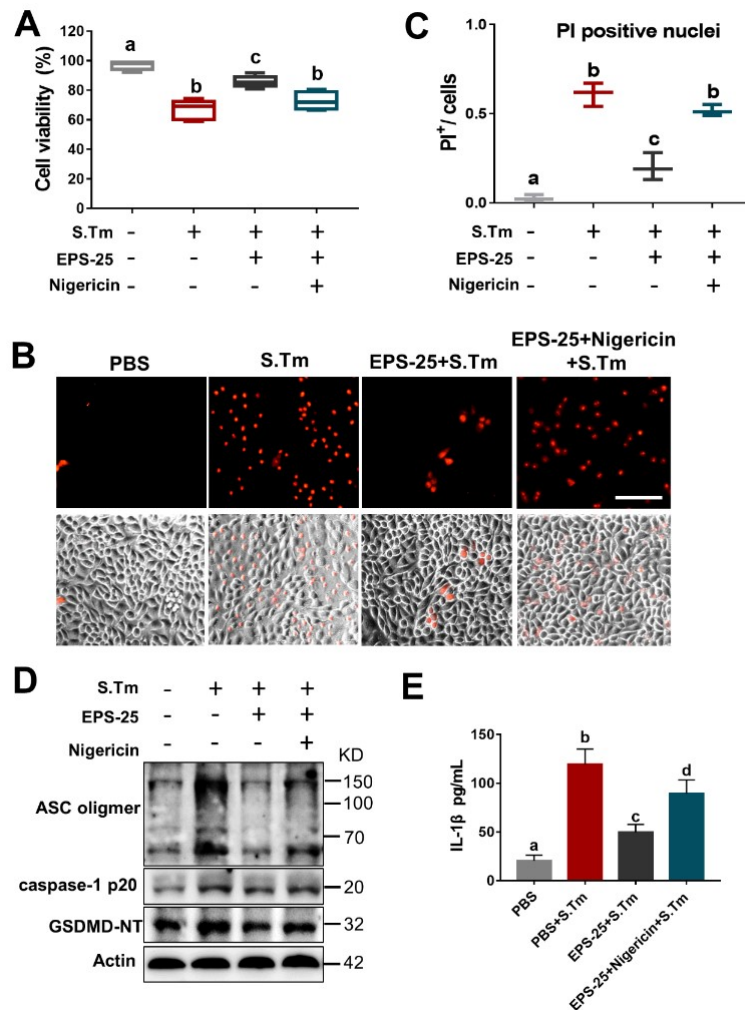

**Figure S3. The inflammasome activation reduces the anti-pyrogenic effect of EPS 7-4.**

(A) Cell viability. (B and C) Fluorescence images of PI (red) staining and PI positive cells rate. Scale bar indicates

500  $\mu$ m. (D) The protein expression levels of ASC oligomerization, caspase-1 p20, GSDMD-NT, and Actin. (E)

IL-1 $\beta$  content on cell supernatants. n = 3.

### Supplementary Figure 4

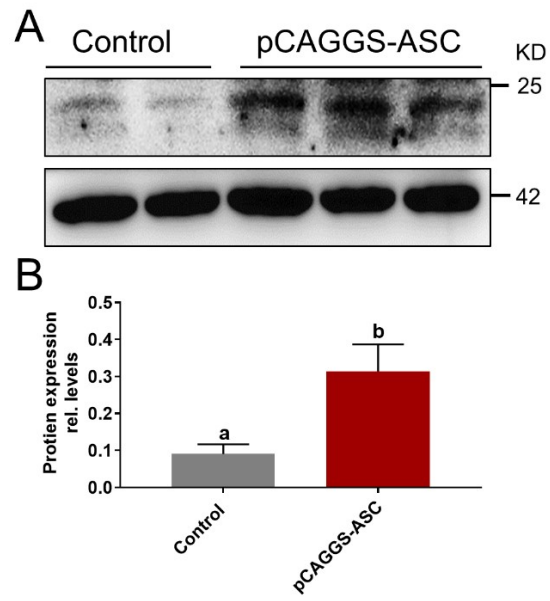

**Figure S4. The validation of ASC protein over-expression.**

(A and B) Representative protein bands and statistical analysis of ASC. n = 3.
